1 **Title:**

2 **Cross-scale Analysis of Temperature Compensation in the**  
3 **Cyanobacterial Circadian Clock System**

4

5 **Authors:** Yoshihiko Furuike<sup>a,b,1</sup>, Dongyan Ouyang<sup>a,1</sup>, Taiki Tominaga<sup>c,1</sup>, Tatsuhiro Matsuo<sup>d,2</sup>,  
6 Atsushi Mukaiyama<sup>a,b</sup>, Yukinobu Kawakita<sup>e</sup>, Satoru Fujiwara<sup>d,\*</sup>, and Shuji Akiyama<sup>a,b,\*</sup>

7 **Affiliations:** <sup>a</sup>Research Center of Integrative Molecular Systems, Institute for Molecular Science,  
8 National Institute of Natural Sciences, 444-8585 Okazaki, Japan. <sup>b</sup>Department of Functional  
9 Molecular Science, SOKENDAI (The Graduate University for Advanced Studies), 444-8585  
10 Okazaki, Japan. <sup>c</sup>Neutron Science and Technology Center, Comprehensive Research  
11 Organization for Science and Society (CROSS), 162-1 Shirakata, Tokai, Ibaraki 319-1106, Japan.  
12 <sup>d</sup>Institute for Quantum Life Science, National Institutes for Quantum and Radiological Science and  
13 Technology, 2-4 Shirakata, Tokai, Ibaraki 319-1106, Japan. <sup>e</sup>Japan Atomic Energy Agency, 2-4  
14 Shirakata, Tokai, Ibaraki 319-1195, Japan. <sup>1</sup>Contributed equally to this work. <sup>2</sup>Present Address: #1:  
15 Laboratoire Interdisciplinaire de Physique (LiPhy), Grenoble-Alpes University, 140 rue de la  
16 physique, 38402 Saint Martin d'Hères, France. #2: Institut Laue-Langevin, 71 avenue des Martyrs,  
17 CS 20156, 38042 Grenoble Cedex 9, France.

18 **Materials and Correspondence:** \*Shuji Akiyama, \*Satoru Fujiwara

19 **Email:** akiyamas@ims.ac.jp, fujiwara.satoru@qst.go.jp

20 **Author Contributions:** Y.F. and S.A. designed the study; Y.F., D.O., T.M., and A.M. prepared  
21 samples; Y.F. and D.O. conducted biochemical assays; Y.F., T.T., T.M., Y.K., S.F., and S.A.  
22 performed QENS experiments; Y.F., T.T., T.M., Y.K., S.F., and S.A. analyzed QENS data; and S.A.,  
23 S.F., and Y.F. wrote the paper with input from all authors.

24 **Competing Interest Statement:** The authors declare no competing interest.

25 **This PDF file includes:**

26 Main Text  
27 Figures 1 to 7  
28

## 29 **Abstract**

30 Clock proteins maintain constant enzymatic activity regardless of temperature, even though  
31 thermal fluctuation is accelerated as temperature increases. We investigated temperature  
32 influences on the dynamics of KaiC, a temperature-compensated ATPase in the cyanobacterial  
33 circadian clock system, using quasielastic neutron scattering. The frequency of picosecond to sub-  
34 nanosecond incoherent local motions in KaiC was accelerated very slightly in a temperature-  
35 dependent manner. Our mutation studies revealed that internal motions of KaiC include several  
36 contributions of opposing temperature sensitivities. To take advantage of this balancing effect, the  
37 motional frequency of local dynamics in KaiC needs to exceed  $\sim 0.3 \text{ ps}^{-1}$ . Some of the mutation  
38 sites may be in a pathway through which the motional frequency in the C-terminal domain of KaiC  
39 is fed back to the active site of ATPase in its N-terminal domain. The temperature-compensating  
40 ability at the dynamics level is likely crucial for circadian clock systems, into which the clock proteins  
41 are incorporated, to achieve reaction- or even system-level temperature compensation of the  
42 oscillation frequency.

43

44

## 45 **Main Text**

46

### 47 **Introduction**

48 Circadian clocks are endogenous timing systems that rhythmically control various  
49 biological processes with an approximately 24-hour period<sup>1</sup>. This rhythm persists stably even  
50 without any external cues, and the period length is kept constant even when ambient temperature  
51 changes (temperature compensation). The phase of the clock system can be shifted upon receiving  
52 external stimuli such as light and temperature and then synchronized to the phase of the outer  
53 world. These unique characteristics enable organisms to optimize their fitness during day/night  
54 environmental cycles<sup>2, 3, 4, 5</sup>.

55 Temperature compensation is a remarkable characteristic of the circadian clock systems.  
56 Q10 values, the factor by which reaction speed or cycle frequency is accelerated by increasing the  
57 ambient temperature by 10°C, are mostly in the range of 0.9–1.1 for circadian clock systems,  
58 whereas those of most biochemical reactions<sup>6</sup> and the Belousov–Zhabotinsky oscillator<sup>7, 8, 9, 10</sup>  
59 range from 2 to 3. As schematically shown in the middle panel of Fig. 1A, circadian clocks exhibiting  
60 system-level temperature compensation often comprise unique clock proteins with temperature-  
61 compensated biochemical activities such as ATPase<sup>11, 12, 13</sup> and kinase/phosphatase<sup>14, 15, 16</sup>. A  
62 simple but attractive idea that emerged from studies<sup>12, 13, 15, 17, 18</sup> of these biochemical activities is  
63 that the reaction-level temperature compensability is somehow correlated to system- or even higher  
64 cell-level temperature compensability (lower panel of Fig. 1A). A great deal of effort has been  
65 devoted to elucidating the mechanism of this connectivity via experimental<sup>12, 13, 15, 16, 18</sup> and  
66 modeling<sup>19, 20, 21, 22, 23</sup> approaches.

67 Nevertheless, temperature compensation remains a puzzling phenomenon in terms of  
68 protein dynamics, as atoms and side chains in proteins should fluctuate more frequently at higher  
69 temperature due to their greater thermal energy. Three extreme cases can be considered (box in  
70 Fig. 1A). First, thermal fluctuation in these key clock proteins is accelerated in a temperature-  
71 dependent manner, as observed for ordinary proteins. Second, the atoms and side chains in  
72 temperature-compensated clock proteins fluctuate in a temperature-insensitive manner via  
73 unknown mechanisms. Third, some opposing but balancing contributions act at the level of protein  
74 dynamics level, i.e., one contribution accelerates but the other decelerates so that they differentially  
75 affect the elementary reaction steps to achieve overall compensation. Experimental investigations  
76 of the dynamics of temperature-compensated clock proteins are needed to distinguish among these  
77 cases.

78 KaiC, a temperature-compensated clock protein in cyanobacterium *Synechococcus*  
79 *elongatus* PCC 7942<sup>11, 12, 13</sup>, acts as a circadian oscillator with other two clock proteins, KaiA and  
80 KaiB<sup>24</sup>. Its most striking feature is that its temperature-compensated circadian rhythm can be  
81 reconstructed even *in vitro* by mixing KaiA, KaiB, and KaiC in the presence of ATP<sup>25</sup> (Fig. 1A). An  
82 ATP molecule binds a Walker motif in each of the tandemly duplicated domains called the N-

83 terminal C1 and C-terminal C2 domains (Fig. 1B). These ATP binding events trigger oligomerization  
84 of KaiC into a double-ring hexamer. The ATP molecule bound to the C2 domain (C2-ATP) is used  
85 mostly as the source of phosphoryl group that is transferred to (auto-kinase) and then removed  
86 from (auto-phosphatase) Ser431 and Thr432 in KaiC. In the presence of KaiA and KaiB, the status  
87 of the dual phosphorylation site alters in a cyclic manner: ST  $\rightarrow$  SpT  $\rightarrow$  pSpT  $\rightarrow$  pST  $\rightarrow$  ST, where  
88 S, T, pS, and pT represent Ser431, Thr432, phosphorylated Ser431, and phosphorylated Thr432,  
89 respectively<sup>26, 27</sup>. The frequency of this phosphorylation cycle (P-cycle) is proportional to the rate  
90 of hydrolysis of C1-bound ATP (C1-ATP) in the absence of KaiA and KaiB (upper panel of Fig. 1A)  
91<sup>12, 13, 17</sup>. More importantly, the ATPase activity of KaiC is perfectly temperature-compensated  
92 ( $Q_{10\text{ATP}} = 1.0$ )<sup>12</sup>. The *in vitro* Kai oscillator that consists of temperature-compensated KaiC  
93 provides a practical means for studying cross-scale properties of temperature-compensation  
94 phenomena at the system, reaction, and dynamics levels (Fig. 1A).

95 Quasielastic neutron scattering (QENS) is a powerful and direct technique for accessing  
96 protein dynamics at the picosecond to nanosecond time scales<sup>28</sup>. Because hydrogen atoms, which  
97 constitute up to half of all atoms in proteins, are distributed near uniformly in the three-dimensional  
98 structures of proteins, an averaged view of protein dynamics can be extracted from QENS spectra  
99<sup>29</sup>. In this study, we designed a series of KaiC mutants (Fig. 1B) with temperature-dependent  
100 periods (Fig. 1C-E), and measured the temperature dependence of their protein dynamics using  
101 the neutron spectrometer DNA at J-PARC MLF<sup>30</sup>. Our QENS data revealed that KaiC establishes  
102 reaction- to cell-level temperature compensation by keeping the frequency of its picosecond to sub-  
103 nanosecond incoherent motions nearly temperature-insensitive, but still high enough to exceed  
104 certain threshold limits.

## 105 106 107 **Results**

108 **Screening and Characterization of Temperature-dependent Mutants of KaiC.** As confirmed by  
109 the positions along the horizontal axis in Fig. 2A, the ATPase activity of KaiC<sup>WT</sup> is as low as 11 d<sup>-1</sup>  
110 and almost temperature-insensitive ( $Q_{10\text{ATP}}^{\text{WT}} = 0.89 \pm 0.10$ ), as previously reported<sup>12</sup>.  
111 Consistently with previous studies<sup>11, 15, 25</sup>, the P-cycle frequency ( $f_P = 24 / \text{period}$ ) of KaiC<sup>WT</sup> in the  
112 presence of KaiA and KaiB was also temperature-compensated (Fig. 2B) ( $Q_{10f_P}^{\text{WT}} = 1.08 \pm 0.01$ ).  
113 Consequently, data points taken at different temperatures for KaiC<sup>WT</sup> nearly overlapped in the  
114 ATPase –  $f_P$  plot (Fig. 2A). Taking advantage of potential reaction–system correlations, we  
115 screened the temperature-dependent mutants of KaiC using an *in vitro* ATPase-based screening  
116 system<sup>31</sup>. Among a number of KaiC mutants screened for temperature-dependent ATPase activity,  
117 three candidates were characterized in detail as they revealed stable but temperature-dependent  
118 system-level oscillation (Fig. 2C–E).

119 The first was the S258A mutant of KaiC (KaiC<sup>S258A</sup>). According to the X-ray crystal structure  
120 of KaiC<sup>WT</sup><sup>32</sup>, S258 is located in the C2 domain (Fig. 1B and 1C). The ATPase activity of KaiC<sup>S258A</sup>  
121 at 303 K ( $6.3 \pm 1.1 \text{ d}^{-1}$ ) was lower than that of KaiC<sup>WT</sup> ( $11.8 \pm 1.1 \text{ d}^{-1}$ ) but increased in a  
122 temperature-dependent manner up to  $14.1 \pm 1.8 \text{ d}^{-1}$  at 318 K ( $Q_{10\text{ATP}}^{\text{S258A}} = 1.73 \pm 0.22$ ) (Fig. 2A).  
123 Consistent with this, the  $f_P$  value for KaiC<sup>S258A</sup> increased from 0.71 to  $1.32 \text{ d}^{-1}$  as the temperature  
124 increased (Fig. 2C) ( $Q_{10f_P}^{\text{S258A}} = 1.54 \pm 0.01$ ). Because of this correlation, the data trace for  
125 KaiC<sup>S258A</sup> extends almost diagonally from low- to high-temperature conditions in the ATPase –  $f_P$   
126 plot (Fig. 2A). The two mutants (KaiC<sup>F247A</sup>, KaiC<sup>Q361E</sup>), which replaced residues that neighbored in  
127 the C1–C2 interface (Fig. 1B), are also traced diagonally (Fig. 2A). The  $f_P$  value for KaiC<sup>F247A</sup>  
128 increased from 1.11 to  $1.95 \text{ d}^{-1}$  as temperature increased (Fig. 2D) ( $Q_{10f_P}^{\text{F247A}} = 1.40 \pm 0.01$ ), as  
129 observed for the mutant's ATPase activity (Fig. 2A) ( $Q_{10\text{ATP}}^{\text{F247A}} = 1.47 \pm 0.05$ ), whereas KaiC<sup>Q361E</sup>  
130 exhibited a slightly weakened correlation between  $Q_{10\text{ATP}}^{\text{Q361E}}$  ( $1.70 \pm 0.15$ ) and  $Q_{10f_P}^{\text{Q361E}}$   
131 ( $1.27 \pm 0.02$ ) (Fig. 2E and 2F).

132 Taking into consideration the limited persistence of the KaiC<sup>F247A</sup> P-cycle at 318 K (Fig.  
133 2D), we dissolved KaiC<sup>WT</sup> and the three KaiC mutants exhibiting reaction–system correlation in a  
134 D<sub>2</sub>O buffer and subjected them to QENS experiments at low and high temperatures: 302 and 312  
135 K for the fully dephosphorylated form of KaiC<sup>WT</sup> (SI Appendix, Fig. S1), and 302 and 309 K for

136 KaiC<sup>S258A</sup>, KaiC<sup>F247A</sup>, and KaiC<sup>Q361E</sup>. Noted that the circadian rhythm of KaiC<sup>WT</sup> was barely  
137 influenced by the D<sub>2</sub>O buffer used in this study (light blue circles in Fig. 2B).  
138

139 **KaiC Dynamics Detected by QENS.** To investigate the temperature dependence of KaiC  
140 dynamics, we conducted QENS experiments at low and high temperatures. As shown in Fig. 3A, a  
141 difference QENS spectrum  $S(Q,E)$  of KaiC<sup>WT</sup>, where  $Q$  is the momentum transfer and  $E$  is the  
142 energy transfer of neutrons, could be obtained at each temperature by subtracting the background  
143 spectrum of the D<sub>2</sub>O solvent from the sample spectrum, on the basis of scaling factors calculated  
144 from neutron scattering cross sections. The resultant  $S(Q,E)$  for KaiC<sup>WT</sup> at 302 and 312 K shared  
145 a common feature of a broadened elastic peak and a quasielastic component derived from global  
146 and local motions, respectively (Fig. 3A). To analyze the  $Q$ - and temperature dependencies of  
147 these two components quantitatively, we attempted to fit the following equation<sup>28</sup> to each  $S(Q,E)$ :  
148

$$149 \quad S(Q,E) = [A_0(Q)\delta(E) + \{1 - A_0(Q)\} L_{\text{local}}(Q,E)] \otimes L_{\text{global}}(Q,E) \otimes RF(Q,E) + BG(Q) \quad [1]$$

150  
151 where  $A_0(Q)$  is the elastic incoherent structure factor (EISF);  $\delta(E)$  is Dirac delta function;  $RF(Q,E)$   
152 is the instrumental resolution function obtained from the spectrum of vanadium;  $BG(Q)$  is the  
153 background; and  $L_{\text{local}}(Q,E)$  and  $L_{\text{global}}(Q,E)$  are Lorentzian functions,  $(\Gamma(Q) / \pi) (E^2 + \Gamma(Q)^2)^{-1}$ ,  
154 describing local internal motion and global diffusive motion of the protein, respectively, where  $\Gamma(Q)$   
155 is the half width at half maximum (HWHM).  $Q$ -averaged  $\chi^2$  values resulting from fitting of Eq. 1  
156 to the experimental data of KaiC<sup>WT</sup> was  $\sim 0.96 \pm 0.04$  (upper and middle panels of Fig. 3A), assuring  
157 optimum quality of the curve-fitting procedure. In the following, we describe the global and local  
158 motions of KaiC on the basis of temperature dependencies of  $\Gamma_{\text{global}}(Q)$  and  $\Gamma_{\text{local}}(Q)$ , respectively.  
159

160 **Global Motions of KaiC.**  $\Gamma_{\text{global}}(Q)$  provides information on the frequency of the global motions,  
161 whose properties are most straightforwardly inspected using the plot of  $\Gamma_{\text{global}}(Q)$  vs  $Q^2$ . Linear  $Q^2$ -  
162 dependencies of  $\Gamma_{\text{global}}(Q)$  were confirmed for KaiC<sup>WT</sup> at both high and low temperatures (Fig. 4A),  
163 indicating its boundary-free diffusions including translational and rotational diffusions. Thus, the  
164 linear slope in Fig. 4A relates to an apparent boundary-free diffusion coefficient ( $D_{\text{global}}$ ). The  $D_{\text{global}}$   
165 for KaiC<sup>WT</sup> at 302 and 312 K were  $3.53 \pm 0.06$  and  $4.32 \pm 0.06 \cdot 10^{-7} \text{ cm}^2 \text{ s}^{-1}$ , respectively (Fig. 4E),  
166 which were similar to those ( $3.81$  and  $4.88 \cdot 10^{-7} \text{ cm}^2 \text{ s}^{-1}$ ) calculated using the known crystal structure  
167 of the KaiC hexamer (Fig. 1B) (SI Appendix, Table S1 and Section S.1.). The observed temperature  
168 dependencies of the  $D_{\text{global}}$  ( $Q10_{\text{global}}$ ) for KaiC<sup>WT</sup> and the KaiC mutants (Fig. 4B-D) were  
169 approximately 1.2 (Fig. 4E), similar to other examples:  $\sim 1.2$  (300–310 K) in human hemoglobin  
170 (Hb)<sup>33</sup> and  $\sim 1.2$  (290–300 K) in  $\alpha$ -synuclein ( $\alpha$ Syn)<sup>34</sup>. Thus, KaiC<sup>WT</sup> and the KaiC mutants were  
171 maintained as intact hexamers during the QENS measurements, and underwent the same  
172 translational and rotational diffusions as ordinary proteins.  
173

174 **Balanced Contributions of Local Motions Revealing Different Sensitivities to Temperature.**  
175 In contrast to the global motions, the local fluctuations of side-chain and main-chain in KaiC  
176 revealed unique temperature dependencies.  $\Gamma_{\text{local}}(Q)$  of KaiC<sup>WT</sup> increased asymptotically to  
177 approach a plateau at high  $Q^2$  (Fig. 5A). As at high  $Q$ , the motions over short distances  
178 predominate, the plateau values correspond to the elementary displacements of the local motions.  
179 Thus, in the saturated  $Q^2$ -range higher than  $1.8 \text{ \AA}^{-2}$ , a  $Q$ -averaged ratio of  $\Gamma_{\text{local}}(Q)$  taken at high  
180 and low temperatures serves as a good model-free measure of the temperature dependence of the  
181 internal motions ( $Q10_{\text{local,app}}$ ). The  $Q10_{\text{local,app}}$  value for KaiC<sup>WT</sup> was  $1.15 \pm 0.03$  (Fig. 5E), implying  
182 a limited temperature dependence of the local motions. On the other hand, the temperature-  
183 dependent mutants exhibited diverse behaviors in response to temperature change. Near-perfect  
184 insensitivities of  $\Gamma_{\text{local}}(Q)$  were observed for both KaiC<sup>S258A</sup> (Fig. 5B,  $Q10_{\text{local,app}}^{\text{S258A}} = 1.06 \pm 0.07$ )  
185 and KaiC<sup>Q361E</sup> (Fig. 5D,  $Q10_{\text{local,app}}^{\text{Q361E}} = 0.96 \pm 0.05$ ).  $\Gamma_{\text{local}}(Q)$  of KaiC<sup>F247A</sup> decreased in an  
186 unusual manner as the temperature increased (Fig. 5C), indicating an inverse temperature  
187 dependence ( $Q10_{\text{local,app}}^{\text{F247A}} = 0.80 \pm 0.06$ ) (Fig. 5E). Noted that these unique responses of the

188 KaiC mutants could be visually confirmed by some difference in the raw (lower panel in Fig. 3) and  
 189 Q-averaged (SI Appendix, Fig. S2) QENS spectra.

190 The uniqueness of the local motions was also predicted by model-based analysis using a  
 191 jump-diffusion model<sup>28</sup>:  $\Gamma_{\text{local}}(Q) = D_{\text{local}}Q^2(1 + D_{\text{local}}Q^2\tau)^{-1}$ , where  $D_{\text{local}}$  is the jump-diffusion  
 192 coefficient and  $\tau$  is the residence time spent on one site before jumping to others. The model gave  
 193 reasonable fits to temperature- and  $Q^2$ -dependent  $\Gamma_{\text{local}}(Q)$  (lines in Fig. 5A–D). The resultant  $\tau^{-1}$   
 194 values for KaiC<sup>WT</sup> at 302 and 312 K were  $0.36 \pm 0.01$  and  $0.41 \pm 0.02$  ps<sup>-1</sup>, respectively (Fig. 5E).  
 195 The model-based temperature dependence ( $Q10_{\text{local}}$ ) estimated as a ratio of the  $\tau^{-1}$  values, was  
 196  $1.15 \pm 0.06$  for KaiC<sup>WT</sup>, consistent with model-free  $Q10_{\text{local,app}}^{\text{WT}}$  of  $1.15 \pm 0.03$  (Fig. 5E). The  
 197 coincidences between  $Q10_{\text{local}}$  and  $Q10_{\text{local,app}}$  were also confirmed for the KaiC mutants.

198 A common feature of the temperature-dependent mutants was substantial deceleration of  
 199 local dynamics at both temperatures (Fig. 5E). The  $\tau^{-1}$  values for KaiC<sup>S258A</sup> were  $0.25 \pm 0.01$  and  
 200  $0.26 \pm 0.02$  ps<sup>-1</sup> at low and high temperatures, respectively, and were reduced approximately 60–  
 201 70% relative to KaiC<sup>WT</sup> (Fig. 5E). Similarly, the local motions in KaiC<sup>Q361E</sup> was 30~40% slower  
 202 ( $0.24\sim 0.25 \pm 0.01$  ps<sup>-1</sup>) than KaiC<sup>WT</sup> (Fig. 5E). Effects of the F247A substitution on local dynamics  
 203 became so obvious at high temperature as to reveal a reduced  $\tau^{-1}$  value of  $0.15 \pm 0.01$  ps<sup>-1</sup>  
 204 ( $Q10_{\text{local}}^{\text{F247A}} = 0.80 \pm 0.09$ ). To ensure temperature compensability at both the reaction and system  
 205 levels (Fig. 1A), the local motions of KaiC must be accelerated very slightly in a temperature-  
 206 dependent manner ( $Q10_{\text{local}}^{\text{WT}} = 1.15 \pm 0.06$ ), but the absolute frequency of the fluctuations must  
 207 also exceed certain threshold limits ( $\sim 0.3$  ps<sup>-1</sup> in Fig. 5E).  $D_{\text{local}}$  was essentially unaffected by  
 208 temperature change or mutations (Fig. 5F), except in the case of KaiC<sup>F247A</sup>, where a large error of  
 209  $D_{\text{local}}$  at high temperature prevented us from identifying clear tendency.

210 These results suggest that KaiC dynamics include temperature-dependent acceleration  
 211 ( $Q10_{\text{local}}^{\text{WT}} = 1.15 \pm 0.06$ ) as well as temperature-independent ( $Q10_{\text{local}}^{\text{S258A}} = 1.05 \pm 0.11$ ,  
 212  $Q10_{\text{local}}^{\text{Q361E}} = 0.97 \pm 0.10$ ) and temperature-dependent decelerating motions  
 213 ( $Q10_{\text{local}}^{\text{F247A}} = 0.80 \pm 0.09$ ) (Fig. 5E). The fact that even a single amino acid substitution has  
 214 significant impact on motional frequency and its temperature sensitivity (Fig. 5E), depending on  
 215 where it is introduced, implies that overall temperature compensability of the local motions in KaiC  
 216 is in a delicate balance that relies on the interplay of several opposing temperature sensitivities.

217  
 218 **Fractional Increase in Apparently Immobile Atoms in the Temperature-dependent ATPase**  
 219 **Mutants of KaiC.** EISF is defined as the ratio of the elastic peak intensity to the sum of elastic and  
 220 quasielastic scattering intensities as in Eq. (1), providing information on the geometry of molecular  
 221 motions and the fraction of mobile and immobile atoms on the time scale ( $\sim 55$  ps) of the  
 222 spectrometer. As shown in Fig. 6A–D, EISF of KaiC<sup>WT</sup> and the mutants were plotted against  $Q$  and  
 223 then fitted using the following equation, assuming diffusion in an ensemble of spheres whose radii  
 224 ( $a$ ) follow a lognormal distribution<sup>35</sup>:

$$225 \quad EISF(Q) = p + (1 - p) \int_0^\infty \frac{1}{s\sqrt{2\pi a}} e^{-\frac{(\ln(a/c))^2}{2s^2}} \left[ \frac{3j_1(Qa)}{Qa} \right]^2 da \quad [2]$$

226  
 227 where  $p$  is the fraction of atoms whose motions are outside the current instrumental energy window  
 228 and therefore appear immobile;  $(1 - p)$  correspond to the fraction of atoms diffusing within the  
 229 sphere ensemble;  $c$  is the median of the distribution;  $s$  is the variance in the natural logarithmic  
 230 space; and  $j_1$  denotes the spherical Bessel function of the first kind of order.

231 The results of EISF analysis support the unique behaviors of the temperature-dependent  
 232 mutants of KaiC. Consistent with the  $Q10_{\text{local}}$  value of  $1.15 \pm 0.06$  for KaiC<sup>WT</sup>, its immobile fraction  
 233 was maintained at approximately 0.47 at both high and low temperatures (Fig. 6E). The immobile  
 234 fractions of KaiC<sup>S258A</sup> and KaiC<sup>Q361E</sup> were nearly unaffected by temperature change within the  
 235 experimental error. On the other hand, the immobile fraction of KaiC<sup>F247A</sup>, whose local motions  
 236 exhibited an inverse temperature dependence ( $Q10_{\text{local}}^{\text{F247A}} = 0.80 \pm 0.09$ ), increased 7% as the  
 237 temperature increased. At the same time, all the KaiC mutants exhibited larger immobile fractions  
 238 than KaiC<sup>WT</sup>. This result that the amino acid substitutions shifted certain motions from mobile to  
 239 immobile fractions (Fig. 6E) is consistent with the systematic decrease in the  $\tau^{-1}$  values in the KaiC  
 240

241 mutants (Fig. 5E). A similar trend was also confirmed in the EISF analysis based on a diffusion-  
242 inside-two-spheres model<sup>36</sup> (*SI Appendix*, Fig. S3 and Section S.2.). In KaiC<sup>WT</sup>, atoms diffusing  
243 within a radius of 6–7 Å (Fig. 6F) constituted a major mobile component at low and high  
244 temperatures. By contrast, the mobile fractions of the KaiC mutants were distributed mainly in  
245 reduced radii of 2–3 Å relative to KaiC<sup>WT</sup>. Thus, KaiC<sup>S258A</sup>, KaiC<sup>F247A</sup>, and KaiC<sup>Q361E</sup> are the  
246 temperature-dependent ATPase mutants with reduced frequencies (Fig. 5E and 6E) and  
247 amplitudes (Fig. 6F) of local motions, and likely behave as if they sense temperatures lower than  
248 that felt by KaiC<sup>WT</sup>.

249  
250

## 251 Discussion

252 Over the past decades, chronobiologists have sought a reasonable model that explains the three  
253 physiological properties of the circadian clock systems: self-sustained oscillation, temperature  
254 compensation, and synchronization<sup>2, 3, 4</sup>. The circadian clock of cyanobacteria is an ideal  
255 experimental system for this purpose, as its physiological properties can be studied in relation to  
256 the physicochemical properties of clock-related components at the molecular and atomic scales.

257 Among the three Kai proteins, KaiC is the core of the cyanobacterial clock system. In the  
258 presence of both KaiA and KaiB, KaiC exhibits a phosphorylation rhythm (Fig. 2B) whose frequency  
259 ( $f_p$ ) is correlated with the ATPase activity of KaiC alone (Fig. 2A). For example, when the ATPase  
260 activity of KaiC doubles as a result of amino acid substitutions, the frequencies of both the *in vitro*  
261 system-scale and the cellular-scale rhythms also double (upper panel of Fig. 1A)<sup>12, 17, 25</sup>.

262 This causal relationship, in which properties are transferred through upward causation from  
263 bottom to top in the spatiotemporal hierarchy, was also confirmed for temperature compensation  
264 from the reaction to the cellular scale (lower panel of Fig. 1A). The ATPase activity of KaiC<sup>WT</sup> is  
265 temperature compensated; probably because of this, both the *in vitro* and *in vivo* rhythms<sup>13</sup> are  
266 also temperature-independent. This phenomenological interpretation is further supported by the  
267 three examples of temperature-dependent mutants of KaiC. In contrast to KaiC<sup>WT</sup>  
268 ( $Q_{10_{ATP}}^{WT} = 0.89 \pm 0.10$ ), the  $f_p$  values for KaiC<sup>S258A</sup> ( $Q_{10_{ATP}}^{S258A} = 1.73 \pm 0.22$ ), KaiC<sup>F247A</sup>  
269 ( $Q_{10_{ATP}}^{F247A} = 1.47 \pm 0.05$ ), and KaiC<sup>Q361E</sup> ( $Q_{10_{ATP}}^{Q361E} = 1.70 \pm 0.15$ ) increased in a temperature-  
270 dependent manner (Fig. 2A). These results clearly demonstrate that temperature compensation is  
271 established from the reaction to the system scale through cross-scale causal relationships arising  
272 from the temperature-compensated ATPase activity of KaiC.

273 Our QENS observations indicate that the causal relationship becomes less simple when  
274 the spatiotemporal scale is extended down to local dynamics (*Box* in Fig. 1A). This is because the  
275 local motions in KaiC<sup>WT</sup> and its temperature-dependent ATPase mutants respond uniquely to  
276 temperature increase. Taking into account the fact that temperature increase slightly accelerates  
277 local dynamics of KaiC<sup>WT</sup> ( $Q_{10_{local}}^{WT} = 1.15 \pm 0.06$ ), the crosstalk between the reaction and  
278 dynamics levels is not so simple, even if the causal relationship can be extended to down to the  
279 microscopic scale. In fact, the simple extension is unrealistic for KaiC<sup>F247A</sup>, as its local fluctuation  
280 obeys an inverse temperature dependence ( $Q_{10_{local}}^{F247A} = 0.80 \pm 0.09$ ) as opposed to its  
281 temperature-dependent ATPase activity ( $Q_{10_{ATP}}^{F247A} = 1.47 \pm 0.05$ ). The same applies to both  
282 KaiC<sup>S258A</sup> and KaiC<sup>Q361E</sup>, whose local dynamics are temperature-compensated  
283 ( $Q_{10_{local}}^{S258A} = 1.05 \pm 0.11$ ,  $Q_{10_{local}}^{Q361E} = 0.97 \pm 0.10$ ).

284 These puzzling yet important observations may be reasonably interpreted by taking into  
285 account the absolute frequencies of the local fluctuations. Apart from the temperature sensitivity,  
286 all the temperature-dependent mutants of KaiC exhibited a substantial deceleration of local  
287 dynamics at both temperatures (Fig. 5E). Our observations suggest that KaiC<sup>WT</sup> establishes  
288 temperature compensation at both the reaction and system levels by keeping the frequencies of its  
289 local motions nearly temperature-insensitive but high enough to exceed certain threshold limits  
290 ( $\sim 0.3$  ps<sup>-1</sup>). A rate-limiting step of the ATPase cycle, which is yet to be determined experimentally,  
291 likely receives some feedback through local protein motions to achieve a constant ATPase activity;  
292 therefore, the frequency of the associated fluctuations must be similar regardless of temperature  
293 (Fig. 7A). The QENS data of both KaiC<sup>S258A</sup> and KaiC<sup>Q361E</sup> imply that even if motional frequency is

294 nearly constant when temperature changes, the feedback frequency through the local motions must  
295 be high enough to suppress the inherent temperature-dependent increase (Fig. 5E).

296 Our results are worth discussing from the viewpoint of the crystallographic structure. S258  
297 is located in the outer radius side of the C2 ring (Fig. 1B); the side chain is hydrogen bonded to that  
298 of R326 in the neighboring C2 domain (Fig. 1C). This inter-domain hydrogen bond is thus disrupted  
299 in KaiC<sup>S258A</sup>. We speculate that inter-C2-domain hydrogen bonds play important roles in keeping  
300 the motional frequency of KaiC intact.

301 Although F247 and Q361 neighbor each other in the C1–C2 interface (Fig. 1B), the local  
302 dynamics resulting from each mutation obeyed different temperature dependencies (Fig. 5E). The  
303 fact that mutations into the C1–C2 interface produced variants with diverse temperature  
304 dependence may indicate that the C1–C2 interface is inherently dynamic and fluctuating, and is  
305 formed by complex interactions that themselves have diverse dependence on temperature.  
306 Actually, the C1–C2 interface is stabilized by a limited number of inter-domain contacts with lower  
307 packing density than the C1–C1 and C2–C2 interfaces (*SI Appendix*, Fig. S4), exemplified by the  
308 non-bonded interactions associated with F247 and Q361 (Fig. 1B). The plane of the phenyl ring of  
309 F247 in the C1 domain lies nearly parallel to the C1–C2 interface (Fig. 1D), filling the loosely packed  
310 boundary through a hydrophobic interaction with L360 in the C2 domain. The F247A substitution is  
311 thus interpreted as the mutation that converts the local dynamics from nearly temperature-  
312 insensitive to inverse temperature-dependent ( $Q_{10_{\text{local}}}^{\text{F247A}} = 0.80 \pm 0.09$ ) by making the  
313 intrinsically low-density interface even looser and more fluctuating. This suggests that the lower but  
314 delicate packing density at the C1–C2 interface is critical for the temperature-compensated local  
315 dynamics in KaiC. Consistent with this explanation, the temperature-compensatory nature of the  
316 local motions is maintained for KaiC<sup>Q361E</sup> ( $Q_{10_{\text{local}}}^{\text{Q361E}} = 0.97 \pm 0.10$ ), whose packing density at the  
317 C1–C2 interface is not greatly affected by the replacement of glutamine to glutamate (Fig. 1E).  
318 However, because the neutral side chain of Q361 in the C2 domain is potentially hydrogen-bonded  
319 with either T238 or N245 in the C1 domain (Fig. 1E), the Q361E substitution should modulate or  
320 even disrupt the C1–C2 hydrogen-bond interactions with minimal impacts on packing density. Thus,  
321 the reduced motional frequency in KaiC<sup>Q361E</sup> can be ascribed to a weakened coupling between the  
322 C1 and C2 domains through their local motions. In addition to our findings in this study, several  
323 lines of evidence have revealed the dynamic properties of inter-ring stacking of KaiC during the  
324 circadian cycle<sup>37</sup>. In KaiC<sup>WT</sup>, both F247 and Q361 may be positioned in a pathway or a delicate  
325 node that transmits the motional frequency of the C2 domain and its temperature dependence to  
326 the C1 domain, where the ATPase active site is located (Fig. 1B and 7A).

327 Several studies have suggested that fluctuations and structural polymorphs of the clock  
328 proteins play important roles in the circadian clock systems. In mammalian systems, CKI $\delta$ -  
329 dependent phosphorylation is one of the key reactions that regulates period length and its  
330 temperature sensitivity<sup>16</sup>. In CKI $\delta$ , the temperature dependence of substrate affinity is  
331 compensated by the opposing temperature dependence of product affinity<sup>18</sup>. On the basis of  
332 molecular dynamics (MD) simulation, the authors of that study proposed that the temperature  
333 dependence of the amplitude of particular local fluctuations is reversed in the substrate- and  
334 product-bound forms, and that this reversal is one of the origins of the biochemical opposition.  
335 Structural polymorphs of the clock proteins, which have been confirmed by crystallography, NMR,  
336 and MD simulation, also play important roles in the substrate selectivity of CKI $\delta$ <sup>38</sup> and the  
337 interaction between CRY1/2 and the CLOCK-BMAL1 complex<sup>39</sup>. In the cyanobacterial system, the  
338 rhythmic stacking/unstacking of C1- and C2-rings is coupled to the P-cycle of KaiC<sup>37</sup>. The MD  
339 simulation of KaiC suggests a large-scale conformational change during ADP release from the C2  
340 domain<sup>40</sup>. These previous studies mostly provide information on the amplitudes of internal motions,  
341 such as the magnitude and polymorphism of the structural changes. By contrast, this study  
342 provided further insights into the frequency of the internal motions and its temperature dependence  
343 through a more direct experimental approach. The observation that the internal motions of KaiC  
344 consist of temperature-dependent accelerating components as well as temperature-independent  
345 and temperature-dependent decelerating components may be reminiscent of the opposing  
346 fluctuation amplitudes suggested for CKI $\delta$ <sup>18</sup>. It is important to note, however, that the frequency of

347 the internal motions needs to be high enough to take advantage of the intrinsic balancing effect  
348 implemented in KaiC.

349 To date, the QENS method has been used in many studies to characterize the overall  
350 picture of protein dynamics<sup>29</sup>. The scope of QENS research is expanding from small single-domain  
351 proteins<sup>41, 42</sup> to larger and more complex molecular systems<sup>43, 44, 45</sup>, as well as to large-scale  
352 conformational changes such as those that occur upon ligand binding<sup>33, 46, 47</sup>, pressurization<sup>48, 49</sup>,  
353 <sup>50</sup>, unfolding<sup>35, 51, 52, 53, 54, 55</sup>, and fibrillization<sup>34, 56</sup>.

354 It is worth discussing our observations in the light of previous QENS studies on proteins  
355 other than clock-related proteins. The results reported to date for various protein samples indicate  
356 that the  $\tau$  values are mostly distributed in the range of 1–20 ps ( $\tau^{-1} = 0.05\text{--}1.0\text{ ps}^{-1}$ ) (see Grimaldo  
357 *et al*<sup>29</sup> and references therein), although attention must be paid to the differences in measurement  
358 temperature, energy resolution, and analysis methods. The  $\tau$  value for KaiC<sup>WT</sup>, 2.4–2.8 ps ( $\tau$   
359 <sup>1</sup> = 0.36–0.41 ps<sup>-1</sup>), is included in the above range, indicating that the internal motion of KaiC<sup>WT</sup> is  
360 neither exceptionally slow nor too fast.

361 More detailed comparisons of internal motions are possible by making reference for QENS  
362 data for Hb<sup>33</sup> and  $\alpha$ Syn<sup>51</sup>, which were acquired at the same beamline with the same energy  
363 resolution (12  $\mu$ eV / 55 ps). As shown in Fig. 7B, the jump-diffusion frequency of KaiC<sup>WT</sup> at 302 K  
364 ( $\tau^{-1} = 0.36 \pm 0.01\text{ ps}^{-1}$ ) is the fastest among the four examples ( $\tau^{-1} = 0.25\text{--}0.31\text{ ps}^{-1}$ ) for  
365 deoxygenated Hb (deoxy-Hb), CO-bound Hb (CO-Hb), a fibril state of  $\alpha$ Syn (fib- $\alpha$ Syn), and a  
366 monomeric but intrinsically disordered form of  $\alpha$ Syn (mon- $\alpha$ Syn). The  $\tau^{-1}$  value for KaiC<sup>WT</sup> is less  
367 temperature-dependent ( $Q10_{\text{local}}^{\text{WT}} = 1.15 \pm 0.06$ ) than those of deoxy-Hb ( $Q10_{\text{local}}^{\text{deoxy-}}$   
368  $\text{Hb} = 1.32 \pm 0.02$ ), CO-Hb ( $Q10_{\text{local}}^{\text{CO-Hb}} = 1.32 \pm 0.02$ ), and fib- $\alpha$ Syn ( $Q10_{\text{local}}^{\text{fib-}\alpha\text{Syn}} = 1.22 \pm 0.05$ ).  
369 At the same time, it is interesting to note that mon- $\alpha$ Syn exhibits a temperature dependence  
370 ( $Q10_{\text{local}}^{\text{mon-}\alpha\text{Syn}} = 1.15 \pm 0.12$ ) comparable to that of KaiC<sup>WT</sup>. While this similarity of the  $Q10_{\text{local}}$   
371 value cannot be explained simply in terms of structural similarity, it implies that the C1–C2 interface  
372 has a more dynamic nature than would be expected from the static crystal structure (Fig. 1B and  
373 *SI Appendix*, Fig. S4). In contrast to the insensitivity of the internal dynamics upon an R(CO)-to-  
374 T(deoxy) allosteric transition of Hb (Fig. 7B), the temperature-dependent mutants of KaiC exhibit  
375 dramatic changes in the motional frequency and temperature dependence. Based on these  
376 comparisons, we speculate that introducing mutations that disrupt inter-domain interactions may  
377 cause some changes in the local motions of Hb.

378 The mechanism by which a single amino acid substitution can exert a notable effect on  
379 internal protein motions deserves further investigation. Given that QENS detects the average image  
380 of the fluctuations of all hydrogen atoms scattered throughout the protein molecule, it is rare that a  
381 mutation of just one amino acid will be detected as a large change in the QENS spectrum, as  
382 observed in this study. This may be related to the fact that KaiC, as the core of the clock system,  
383 is required to maintain low enzyme activity independent of temperature. Our observations indicate  
384 that KaiC utilizes a subset of internal motions directly or indirectly to control its ATPase activity in  
385 the C1 domain so that it does not become more active as temperature increases (Fig. 7A). At the  
386 same time, there is growing experimental evidence that ordinary enzymes actively utilize internal  
387 motions, thereby increasing the efficiency of overall catalytic reactions<sup>57, 58, 59</sup>. Because functionally  
388 relevant fluctuations often refer to collective motions of atoms on slower time scales ( $\mu$ s to ms),  
389 care must be taken in discussing those motions in relation to the incoherent and fast (ps) dynamics  
390 detected in this study. However, several studies have demonstrated a linkage between ps–ns  
391 fluctuations and slower motions associated with catalytic reactions<sup>60, 61, 62</sup>. Therefore, we envision  
392 that a cross-scale causal relationship from the dynamic to the cellular level serves as the basis of  
393 temperature compensability in the circadian clock system of cyanobacteria.

394

395

## 396 **Materials and Methods**

397 **Expression and Purification of Kai Proteins.** Glutathione S-transferase (GST)-tagged versions  
398 of Kai proteins were constructed in pGEX-6P-1. Each Kai GST-fusion protein was expressed in *E.*  
399 *coli*. BL21(DE3) and purified as reported previously<sup>11, 26</sup>.

400



401 **ATPase Assay.** ATPase activities of KaiC<sup>WT</sup> and its mutants, dissolved in an H<sub>2</sub>O buffer (H1-buffer)  
402 including 20 mM Tris/HCl (pH 8.0), 150 mM NaCl, 5 mM MgCl<sub>2</sub>, 1 mM DTT, 1 mM EDTA, and 1  
403 mM ATP, were measured at 303, 308, 313, and 318 K as previously reported<sup>11, 15</sup>.

404  
405 **In vitro Rhythm Assay.** P-cycles of KaiC<sup>WT</sup> and its mutants (0.2 mg/ml) were initiated by addition  
406 of KaiA (0.04 mg/ml) and KaiB (0.04 mg/ml) in H1-buffer at 303, 308, 313, and 318 K<sup>25</sup>. For  
407 KaiC<sup>F247A</sup> and KaiC<sup>Q361E</sup>, KaiA was added at a 2-fold higher concentration (0.08 mg/ml). Aliquots  
408 taken from the incubated samples were subjected to SDS-PAGE analysis. The relative abundances  
409 of four phosphorylation states of KaiC were quantified by densitometric image analysis of gel bands  
410 using the LOUPE software<sup>63</sup>.

411  
412 **Sample Preparation for QENS.** Every sample was prepared on site immediately before QENS  
413 measurements. KaiC<sup>WT</sup> and its mutants were purified on a gel-filtration column (Superdex 200  
414 15/30, Cytiva) equilibrated with an H<sub>2</sub>O buffer (H2-buffer) containing 50 mM Tris/HCl (pH 8.0), 150  
415 mM NaCl, 5 mM MgCl<sub>2</sub>, 3 mM DTT, 1 mM EDTA, and 20 mM ATP. Collected fractions were  
416 subjected to rapid buffer exchange in a D<sub>2</sub>O buffer (D2-buffer) containing 50 mM Tris/HCl (pD 7.6),  
417 150 mM NaCl, 5 mM MgCl<sub>2</sub>, 3 mM DTT, 1 mM EDTA, and 20 mM ATP using a desalting column  
418 (HiPrep 50, Cytiva). KaiC<sup>WT</sup>, KaiC<sup>S258A</sup>, KaiC<sup>F247A</sup>, and KaiC<sup>Q361E</sup> were concentrated up to 17.0,  
419 12.3, 14.6, and 14.3 mg/mL, respectively. Each 1-mL sample was placed in a double-cylindrical  
420 aluminum cell with a sample thickness of 0.5 mm and sealed tightly with indium wire.

421  
422 **QENS Experiments.** QENS data were recorded using the near-backscattering spectrometer  
423 installed at beamline BL02 (DNA) in the Material and Life Science Experimental Facility of Japan  
424 Proton Accelerator Research Complex (MLF/J-PARC), Tokai, Ibaraki, Japan<sup>30</sup>. QENS spectra  
425 were recorded over an energy transfer range from -0.5 to 1.5 meV with energy resolution (12 μeV)  
426 enabling us to access motions faster than approximately 55 ps. QENS data were collected at 302  
427 and 312 K, or 302 and 309 K with exposure times of 6–10 h for each condition (537–615 kW). The  
428 obtained  $S(Q, E)$  were corrected for detector efficiency using a vanadium standard, and intensities  
429 were normalized as relative intensities using the standard after subtracting the contributions of the  
430 empty cell. The background spectrum of the D2-buffer was subtracted from each sample spectrum  
431 on the basis of scaling factors calculated from neutron scattering cross-sections, as reported  
432 previously<sup>33, 34</sup>. The temperature was controlled by an LS350 (Lakeshore) with He conductance  
433 gas through a GM refrigerator and heat transfer from a cartridge heater installed in a copper block  
434 at the top of a sample cell, while monitoring the temperature at the bottom of the cell.

435  
436 **Estimation of the Q10 values.** The Q10<sub>ATP</sub> and Q10<sub>fp</sub> values at 303 K were estimated from the  
437 slopes of Arrhenius plots of  $f_p$  and ATPase activity, respectively, at four different temperatures (303,  
438 305, 308, and 313 K), as previously reported<sup>63</sup>. Other Q10 values were presented as the ratio of  
439 measurement results ( $R_1$  and  $R_2$ ) at two temperatures ( $T_1$  and  $T_2$ ) using  $Q10 = (R_2 / R_1)^{10 / (T_2 - T_1)}$ .

440  
441 **Calculation of  $D_{global}$ .** The  $D_{global}$  values of KaiC<sup>WT</sup> were simulated at 302 and 312 K using a  
442 previously reported method<sup>42</sup>, the crystal structure (2GBL)<sup>32</sup>, and HYDROPRO<sup>64</sup> (*SI Appendix*,  
443 Section S.1.).

444  
445 **Acknowledgments**  
446 We thank Dr. K. Shibata for his kind support for the trial QENS experiment, and Dr. M. Kataoka  
447 and Dr. H. Kamikubo for their discussions and critical comments on the manuscript. This study was  
448 partly supported by Grants-in-Aid for Scientific Research (17H06165 to S.A.). The QENS  
449 experiments using BL02 (DNA) at the Materials and Life Science Experimental Facility of the J-  
450 PARC were performed under user programs (Proposal No. 2017B0123, 2018B0244, 2019A0308,  
451 and 2020B0073).

452  
453 **References**

- 454 1. Pittendrigh CS. Temporal Organization - Reflections of a Darwinian Clock-Watcher. *Annu.*  
455 *Rev. Physiol.* **55**, 16-54 (1993).  
456
- 457 2. Akiyama S. Structural and dynamic aspects of protein clocks: how can they be so slow and  
458 stable? *Cell. Mol. Life Sci.* **69**, 2147-2160 (2012).  
459
- 460 3. Ode KL, Ueda HR. Design Principles of Phosphorylation-Dependent Timekeeping in  
461 Eukaryotic Circadian Clock. *Csh. Perspect. Biol.* **10**, a028357 (2018).  
462
- 463 4. Partch CL. Orchestration of Circadian Timing by Macromolecular Protein Assemblies. *J.*  
464 *Mol. Biol.* **432**, 3426-3448 (2020).  
465
- 466 5. Narasimamurthy R, Virshup DM. The phosphorylation switch that regulates ticking of the  
467 circadian clock. *Mol. Cell* **81**, 1133-1146 (2021).  
468
- 469 6. Segel IH. *Enzyme kinetics : behavior and analysis of rapid equilibrium and steady state*  
470 *enzyme systems*. Wiley (1975).  
471
- 472 7. Blandamer MJ, Morris SH. Investigation into Effect of Temperature and Added Tert-Butyl  
473 Alcohol on Dynamic Properties of Belousov Reaction. *J. Chem. Soc. Farad. T* **171**, 2319-  
474 2330 (1975).  
475
- 476 8. Koros E. Monomolecular Treatment of Chemical Oscillation. *Nature* **251**, 703-704 (1974).  
477
- 478 9. Ruoff P. Antagonistic Balance in the Oregonator - About the Possibility of Temperature-  
479 Compensation in the Belousov-Zhabotinsky Reaction. *Physica. D* **84**, 204-211 (1995).  
480
- 481 10. Yoshikawa K. Distinct Activation-Energies for Temporal and Spatial Oscillations in the  
482 Belousov-Zhabotinskii Reaction. *B. Chem. Soc. Jpn.* **55**, 2042-2045 (1982).  
483
- 484 11. Mukaiyama A, Ouyang DY, Furuike Y, Akiyama S. KaiC from a cyanobacterium  
485 *Gloeocapsa* sp. PCC 7428 retains functional and structural properties required as the core  
486 of circadian clock system. *Int. J. Biol. Macromol.* **131**, 67-73 (2019).  
487
- 488 12. Terauchi K, *et al.* ATPase activity of KaiC determines the basic timing for circadian clock  
489 of cyanobacteria. *P. Natl. Acad. Sci. USA* **104**, 16377-16381 (2007).  
490
- 491 13. Ito-Miwa K, Furuike Y, Akiyama S, Kondo T. Tuning the circadian period of cyanobacteria  
492 up to 6.6 days by the single amino acid substitutions in KaiC. *P. Natl. Acad. Sci. USA* **117**,  
493 20926-20931 (2020).  
494
- 495 14. Tomita J, Nakajima M, Kondo T, Iwasaki H. No transcription-translation feedback in  
496 circadian rhythm of KaiC phosphorylation. *Science* **307**, 251-254 (2005).  
497
- 498 15. Murayama Y, *et al.* Tracking and visualizing the circadian ticking of the cyanobacterial clock  
499 protein KaiC in solution. *EMBO J.* **30**, 68-78 (2011).  
500
- 501 16. Isojima Y, *et al.* CKI epsilon/delta-dependent phosphorylation is a temperature-insensitive,  
502 period-determining process in the mammalian circadian clock. *P. Natl. Acad. Sci. USA* **106**,  
503 15744-15749 (2009).  
504
- 505 17. Abe J, *et al.* Atomic-scale origins of slowness in the cyanobacterial circadian clock. *Science*  
506 **349**, 312-316 (2015).  
507

- 508 18. Shinohara Y, *et al.* Temperature-Sensitive Substrate and Product Binding Underlie  
509 Temperature-Compensated Phosphorylation in the Clock. *Mol. Cell* **67**, 783-798 (2017).  
510
- 511 19. Ruoff P, Rensing L, Kommedal R, Mohsenzadeh S. Modeling temperature compensation  
512 in chemical and biological oscillators. *Chronobiol. Int.* **14**, 499-510 (1997).  
513
- 514 20. Hatakeyama TS, Kaneko K. Generic temperature compensation of biological clocks by  
515 autonomous regulation of catalyst concentration. *P. Natl. Acad. Sci. USA* **109**, 8109-8114  
516 (2012).  
517
- 518 21. Kurosawa G, Iwasa Y. Temperature compensation in circadian clock models. *J. Theor. Biol.*  
519 **233**, 453-468 (2005).  
520
- 521 22. Das S, Terada TP, Sasai M. Single-molecular and ensemble-level oscillations of  
522 cyanobacterial circadian clock. *Biophys. Physicobiol.* **15**, 136-150 (2018).  
523
- 524 23. Sasai M. Effects of Stochastic Single-Molecule Reactions on Coherent Ensemble  
525 Oscillations in the KaiABC Circadian Clock. *J. Phys. Chem. B* **123**, 702-713 (2019).  
526
- 527 24. Ishiura M, *et al.* Expression of a gene cluster *kaiABC* as a circadian feedback process in  
528 cyanobacteria. *Science* **281**, 1519-1523 (1998).  
529
- 530 25. Nakajima M, *et al.* Reconstitution of circadian oscillation of cyanobacterial KaiC  
531 phosphorylation in vitro. *Science* **308**, 414-415 (2005).  
532
- 533 26. Nishiwaki T, *et al.* A sequential program of dual phosphorylation of KaiC as a basis for  
534 circadian rhythm in cyanobacteria. *EMBO J.* **26**, 4029-4037 (2007).  
535
- 536 27. Rust MJ, Markson JS, Lane WS, Fisher DS, O'Shea EK. Ordered phosphorylation governs  
537 oscillation of a three-protein circadian clock. *Science* **318**, 809-812 (2007).  
538
- 539 28. Bée M. *Quasielastic Neutron Scattering*. Adam Hilger: Bristol (1988).  
540
- 541 29. Grimaldo M, Roosen-Runge F, Zhang F, Schreiber F, Seydel T. Dynamics of proteins in  
542 solution. *Q. Rev. Biophys.* **52**, e7, 1-63 (2019).  
543
- 544 30. Shibata K, *et al.* The Performance of TOF near Backscattering Spectrometer DNA in MLF,  
545 J-PARC. *JPS Conf. Proc.* **2015** **8**, 036022 (2015).  
546
- 547 31. Ouyang DY, Furuike Y, Mukaiyama A, Ito-Miwa K, Kondo T, Akiyama S. Development and  
548 Optimization of Expression, Purification, and ATPase Assay of KaiC for Medium-  
549 Throughput Screening of Circadian Clock Mutants in Cyanobacteria. *Int. J. Mol. Sci.* **20**,  
550 2789 (2019).  
551
- 552 32. Pattanayek R, *et al.* Analysis of KaiA-KaiC protein interactions in the cyano-bacterial  
553 circadian clock using hybrid structural methods. *EMBO J.* **25**, 2017-2028 (2006).  
554
- 555 33. Fujiwara S, *et al.* Ligation-Dependent Picosecond Dynamics in Human Hemoglobin As  
556 Revealed by Quasielastic Neutron Scattering. *J. Phys. Chem. B* **121**, 8069-8077 (2017).  
557
- 558 34. Fujiwara S, *et al.* Dynamical Behavior of Human alpha-Synuclein Studied by Quasielastic  
559 Neutron Scattering. *PLoS One* **11**, e0151447 (2016).  
560

- 561 35. Gibrat G, Assairi FL, Blouquit Y, Craescu CT, Bellissent-Funel MC. Biophysical Study of  
562 Thermal Denaturation of Apo-Calmodulin: Dynamics of Native and Unfolded States.  
563 *Biophys. J.* **95**, 5247-5256 (2008).  
564
- 565 36. Volino F, Dianoux AJ. Neutron Incoherent-Scattering Law for Diffusion in a Potential of  
566 Spherical-Symmetry - General Formalism and Application to Diffusion inside a Sphere. *Mol.*  
567 *Phys.* **41**, 271-279 (1980).  
568
- 569 37. Chang YG, Tseng R, Kuo NW, LiWang A. Rhythmic ring-ring stacking drives the circadian  
570 oscillator clockwise. *P. Natl. Acad. Sci. USA* **109**, 16847-16851 (2012).  
571
- 572 38. Philpott JM, *et al.* Casein kinase 1 dynamics underlie substrate selectivity and the PER2  
573 circadian phosphoswitch. *Elife* **9**, e52343 (2020).  
574
- 575 39. Fribourgh JL, *et al.* Dynamics at the serine loop underlie differential affinity of  
576 cryptochromes for CLOCK:BMAL1 to control circadian timing. *Elife* **9**, e55275 (2020).  
577
- 578 40. Hong L, Vani BP, Thiede EH, Rust MJ, Dinner AR. Molecular dynamics simulations of  
579 nucleotide release from the circadian clock protein KaiC reveal atomic-resolution functional  
580 insights. *P. Natl. Acad. Sci. USA* **115**, E11475-E11484 (2018).  
581
- 582 41. Dee DR, Myers B, Yada RY. Dynamics of Thermodynamically Stable, Kinetically Trapped,  
583 and Inhibitor-Bound States of Pepsin. *Biophys. J.* **101**, 1699-1709 (2011).  
584
- 585 42. Pérez J, Zanotti JM, Durand D. Evolution of the internal dynamics of two globular proteins  
586 from dry powder to solution. *Biophys. J.* **77**, 454-469 (1999).  
587
- 588 43. Zaccai G, *et al.* The fluctuating ribosome: thermal molecular dynamics characterized by  
589 neutron scattering. *Sci. Rep.* **6**, 37138 (2016).  
590
- 591 44. Gaspar AM, Appavou MS, Busch S, Unruh T, Doster W. Dynamics of well-folded and  
592 natively disordered proteins in solution: a time-of-flight neutron scattering study. *Eur.*  
593 *Biophys. J. Biophys.* **37**, 573-582 (2008).  
594
- 595 45. Grimaldo M, Roosen-Runge F, Zhang FJ, Seydel T, Schreiber F. Diffusion and Dynamics  
596 of gamma-Globulin in Crowded Aqueous Solutions. *J. Phys. Chem. B* **118**, 7203-7209  
597 (2014).  
598
- 599 46. Matsuo T, Tominaga T, Kono F, Shibata K, Fujiwara S. Modulation of the picosecond  
600 dynamics of troponin by the cardiomyopathy-causing mutation K247R of troponin T  
601 observed by quasielastic neutron scattering. *BBA-Proteins Proteom.* **1865**, 1781-1789  
602 (2017).  
603
- 604 47. Caronna C, Natali F, Cupane A. Incoherent elastic and quasi-elastic neutron scattering  
605 investigation of hemoglobin dynamics. *Biophys. Chem.* **116**, 219-225 (2005).  
606
- 607 48. Shrestha UR, Bhowmik D, Copley JRD, Tyagi M, Leao JB, Chu XQ. Effects of pressure on  
608 the dynamics of an oligomeric protein from deep-sea hyperthermophile. *P. Natl. Acad. Sci.*  
609 *USA* **112**, 13886-13891 (2015).  
610
- 611 49. Marion J, *et al.* Pressure-induced molten globule state of human acetylcholinesterase:  
612 structural and dynamical changes monitored by neutron scattering. *Phys. Chem. Chem.*  
613 *Phys.* **17**, 3157-3163 (2015).  
614

- 615 50. Golub M, *et al.* High hydrostatic pressure specifically affects molecular dynamics and  
616 shape of low-density lipoprotein particles. *Sci. Rep.* **7**, 46034 (2017).  
617
- 618 51. Fujiwara S, Matsuo T, Sugimoto Y, Shibata K. Segmental Motions of Proteins under Non-  
619 native States Evaluated Using Quasielastic Neutron Scattering. *J. Phys. Chem. Lett.* **10**,  
620 7505-7509 (2019).  
621
- 622 52. Kataoka M, *et al.* Dynamical and structural modifications of staphylococcal nuclease on C-  
623 terminal truncation. *Physica. B* **266**, 20-26 (1999).  
624
- 625 53. Kataoka M, *et al.* Low energy dynamics of globular proteins studied by inelastic neutron  
626 scattering. *J. Phys. Chem. Solids.* **60**, 1285-1289 (1999).  
627
- 628 54. Bu ZM, Neumann DA, Lee SH, Brown CM, Engelman DM, Han CC. A view of dynamics  
629 changes in the molten globule-native folding step by quasielastic neutron scattering. *J. Mol.*  
630 *Biol.* **301**, 525-536 (2000).  
631
- 632 55. Grimaldo M, *et al.* Hierarchical molecular dynamics of bovine serum albumin in  
633 concentrated aqueous solution below and above thermal denaturation. *Phys. Chem. Chem.*  
634 *Phys.* **17**, 4645-4655 (2015).  
635
- 636 56. Fujiwara S, Plazanet M, Matsumoto F, Oda T. Internal motions of actin characterized by  
637 quasielastic neutron scattering. *Eur. Biophys. J. Biophys.* **40**, 661-671 (2011).  
638
- 639 57. Eisenmesser EZ, *et al.* Intrinsic dynamics of an enzyme underlies catalysis. *Nature* **438**,  
640 117-121 (2005).  
641
- 642 58. Terazima M. Enhanced Conformational Fluctuations during Protein Reactions. *Chem. Lett.*  
643 **48**, 802-810 (2019).  
644
- 645 59. Agarwal PK. Role of protein dynamics in reaction rate enhancement by enzymes. *J. Am.*  
646 *Chem. Soc.* **127**, 15248-15256 (2005).  
647
- 648 60. Henzler-Wildman KA, Lei M, Thai V, Kerns SJ, Karplus M, Kern D. A hierarchy of  
649 timescales in protein dynamics is linked to enzyme catalysis. *Nature* **450**, 913-U927 (2007).  
650
- 651 61. Hawkins RJ, McLeish TCB. Coupling of global and local vibrational modes in dynamic  
652 allostery of proteins. *Biophys. J.* **91**, 2055-2062 (2006).  
653
- 654 62. Agarwal PK. A Biophysical Perspective on Enzyme Catalysis. *Biochemistry* **58**, 438-449  
655 (2019).  
656
- 657 63. Furuike Y, Abe J, Mukaiyama A, Akiyama S. Accelerating in vitro studies on circadian clock  
658 systems using an automated sampling device. *Biophys. Physicobiol.* **13**, 235-241 (2016).  
659
- 660 64. Ortega A, Amoros D, de la Torre JG. Prediction of Hydrodynamic and Other Solution  
661 Properties of Rigid Proteins from Atomic- and Residue-Level Models. *Biophys. J.* **101**, 892-  
662 898 (2011).  
663

664 **Figures and Tables**

665

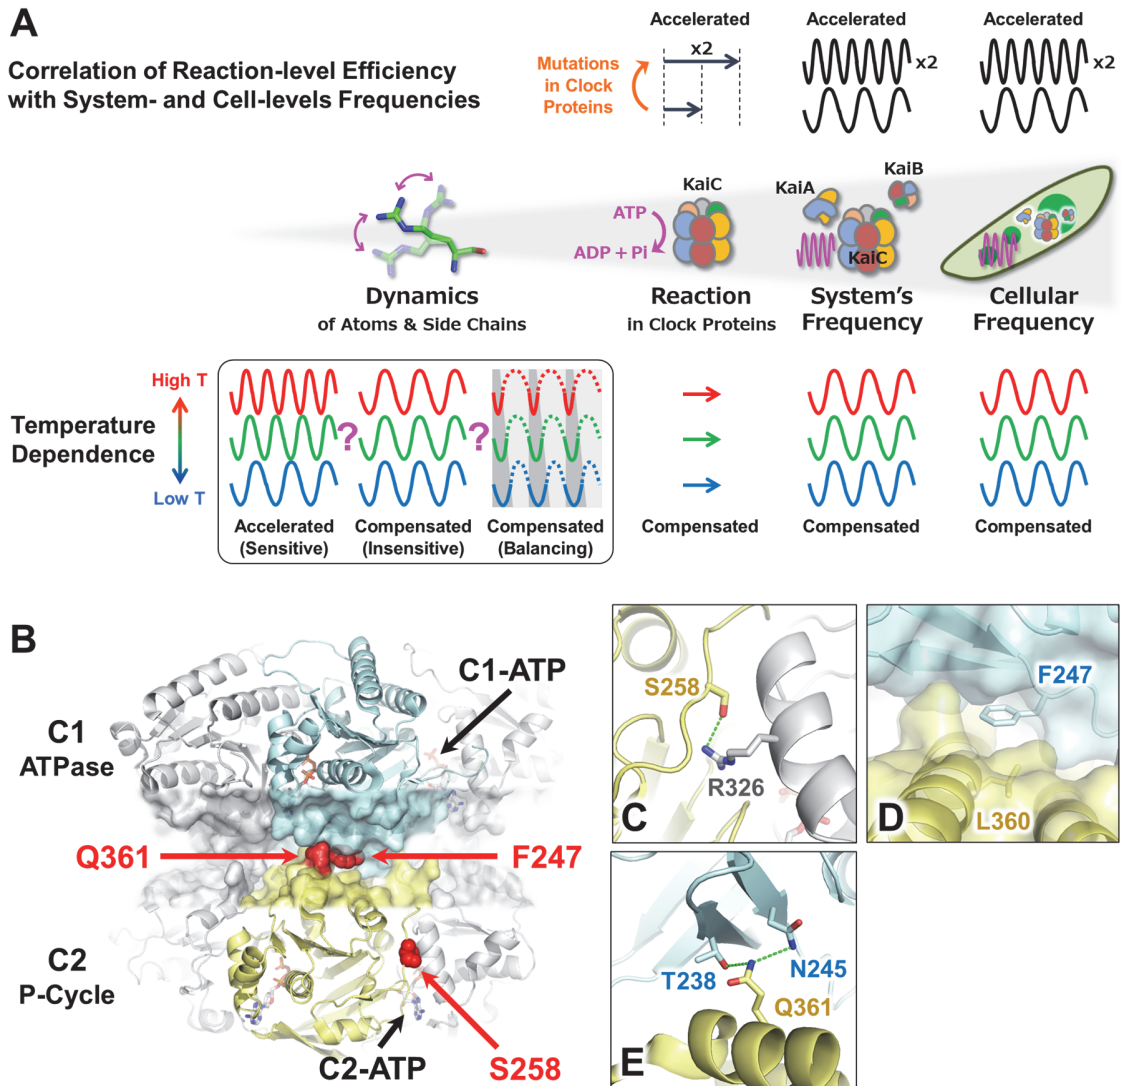

666

667

668

669 **Figure 1.** Impact of KaiC dynamics on temperature compensability in the circadian clock system of

670 cyanobacteria. (A) Potential cross-scale causal relationship in the circadian clock system of

671 cyanobacteria. (Middle) Spatiotemporal hierarchy spanning from atomic-scale dynamics,

672 molecular-scale reaction, molecular system-scale frequency, and cellular-scale frequency. (Upper)

673 Correlation of the reaction-level efficiency with system- and cell-level frequencies in cyanobacteria.

674 When the ATPase activity of KaiC doubles as a result of amino acid substitutions (orange arrow),

675 both the *in vitro* system- and cell-level frequencies also double<sup>12, 17, 25</sup>. (Lower) Potential correlation

676 of temperature sensitivity of clock protein dynamics with reaction-, system-, or cell-level

677 temperature compensability. In cyanobacteria, the temperature sensitivity of ATPase is correlated

678 with those of the system and cell levels. (Box) Three extreme cases of temperature influence on

679 clock-protein dynamics. Thermal fluctuations are sensitively accelerated (Left), insensitively

680 compensated (Center), or sensitively compensated through a balance of opposing contributions

681 (Right). (B) Temperature-dependent ATPase mutation sites mapped onto the crystal structure of

682 KaiC<sup>32</sup>. Zoomed-in-views of (C) S258, (D) F247, and (E) Q361 in KaiC. Hydrogen bonds are

highlighted by green dotted lines.

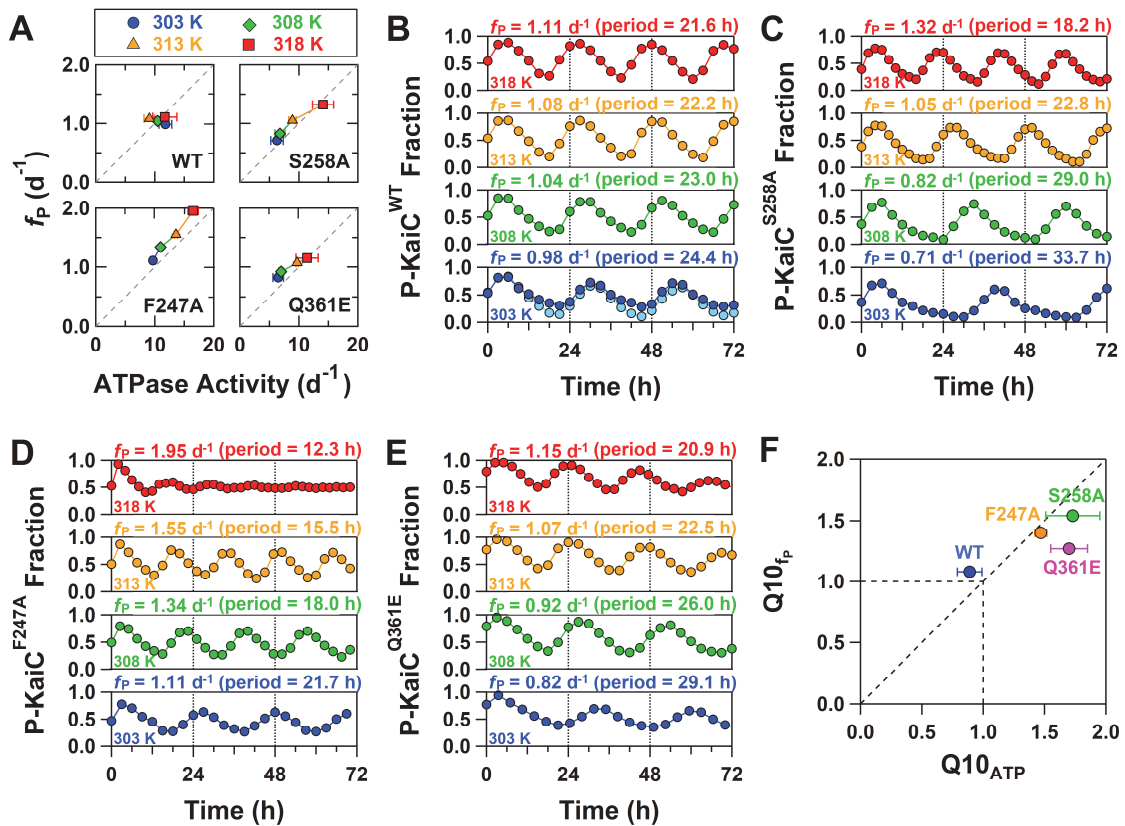

683  
684

685  
686

687 **Figure 2.** Screening and characterization of temperature-dependent mutants of KaiC. (A)  
688 Temperature dependence of the relationship between the ATPase activity of KaiC alone and *in*  
689 *vitro* KaiC phosphorylation-cycle (P-cycle) frequency ( $f_p = 24 / \text{period}$ ) in the presence of KaiA and  
690 KaiB. P-cycles of (B) KaiC<sup>WT</sup>, (C) KaiC<sup>S258A</sup>, (D) KaiC<sup>F247A</sup>, and (E) KaiC<sup>Q361E</sup> at four different  
691 temperatures: 303 (blue), 308 (green), 313 (orange), and 318 K (red). Light blue circles plotted in  
692 panel (B) correspond to the P-cycle of KaiC<sup>WT</sup> in a D<sub>2</sub>O buffer. (F) Correlation of Q10 values  
693 between ATPase (Q10<sub>ATP</sub>) and P-cycle (Q10<sub>f<sub>p</sub></sub>).  
694

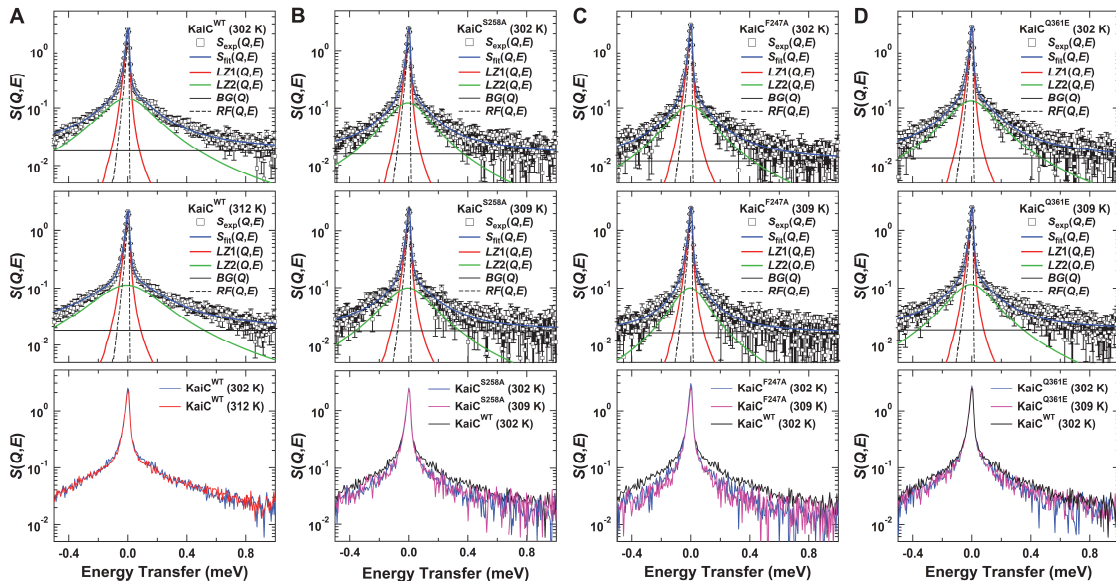

695  
696

697 **Figure 3.** Representative QENS spectra,  $S(Q,E)$ , of (A)  $\text{KaiC}^{\text{WT}}$ , (B)  $\text{KaiC}^{\text{S258A}}$ , (C)  $\text{KaiC}^{\text{F247A}}$ , and  
698 (D)  $\text{KaiC}^{\text{Q361E}}$  at  $Q = 1.45 \text{ \AA}^{-1}$ . (Upper) At the low temperature of 302 K. (Middle) At a high  
699 temperature of 312 or 309 K. Experimental spectra,  $S_{\text{exp}}(Q,E)$ , are fitted using  $S_{\text{fit}}(Q,E)$ , which  
700 includes contributions of two Lorentzian functions,  $LZ1(Q,E) = L_{\text{global}}(Q,E)$  and  
701  $LZ2(Q,E) = L_{\text{global}}(Q,E) \otimes L_{\text{local}}(Q,E)$ , background  $BG(Q)$ , and resolution function  $RF(Q,E)$  as defined  
702 in Eq. 1. (Lower) Comparison of QENS spectra acquired at low and high temperatures. Blue, red,  
703 and magenta lines correspond to the spectra at 302, 312, and 309 K, respectively.



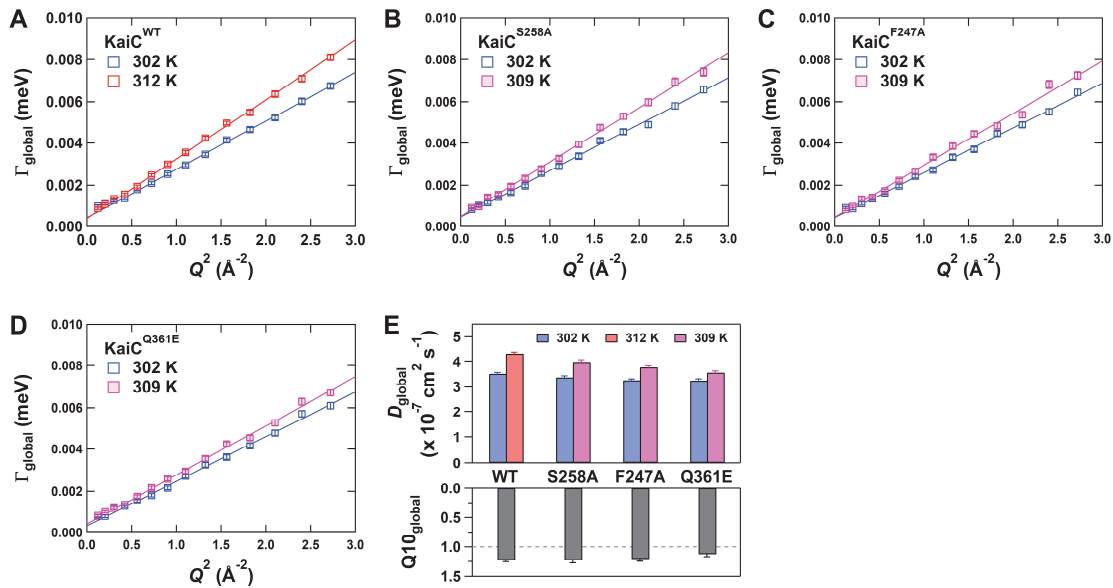

704  
705

706  
707

708 **Figure 4.** Temperature dependence of global motions in KaiC.  $Q^2$ -dependence of  $\Gamma_{\text{global}}(Q)$  for (A)  
709 KaiC<sup>WT</sup>, (B) KaiC<sup>S258A</sup>, (C) KaiC<sup>F247A</sup>, and (D) KaiC<sup>Q361E</sup>. Blue, red, and magenta boxes correspond  
710 to data acquired at 302, 312, and 309 K, respectively. The slope of each linear fit corresponds to  
711 the apparent diffusion coefficient,  $D_{\text{global}}$ . (E)  $D_{\text{global}}$  and its temperature dependence,  $Q10_{\text{global}}$ .  
712

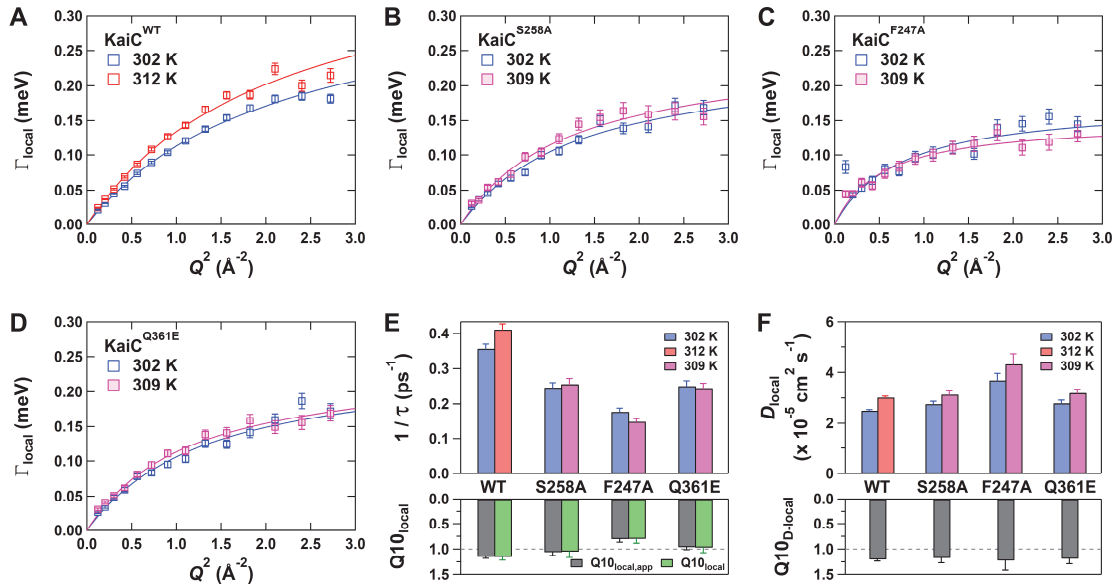

713  
714

715  
716

**Figure 5.** Temperature dependence of local motions in KaiC.  $Q^2$ -dependence of  $\Gamma_{\text{local}}(Q)$  for (A) KaiC<sup>WT</sup>, (B) KaiC<sup>S258A</sup>, (C) KaiC<sup>F247A</sup>, and (D) KaiC<sup>Q361E</sup>. Blue, red, and magenta boxes correspond to the data acquired at 302, 312, and 309 K, respectively. Solid lines represent resultant fits using a jump-diffusion model that predicts the jump-diffusion coefficient,  $D_{\text{local}}$ , as the curvature of the saturating curves and the reciprocal of residence time,  $\tau^{-1}$ , as  $\Gamma_{\text{local}}(Q)$  converged at infinite  $Q$ . (E)  $\tau^{-1}$  and its temperature dependence,  $Q10_{\text{local}}$  (green bars).  $Q10_{\text{local,app}}$  (gray bars) represents a  $Q$ -averaged ratio of  $\Gamma_{\text{local}}(Q)$  taken at high and low temperatures using a  $Q^2$ -range higher than  $1.8 \text{ \AA}^{-2}$ . (F)  $D_{\text{local}}$  and its temperature dependence,  $Q10_{D_{\text{local}}}$ .

725

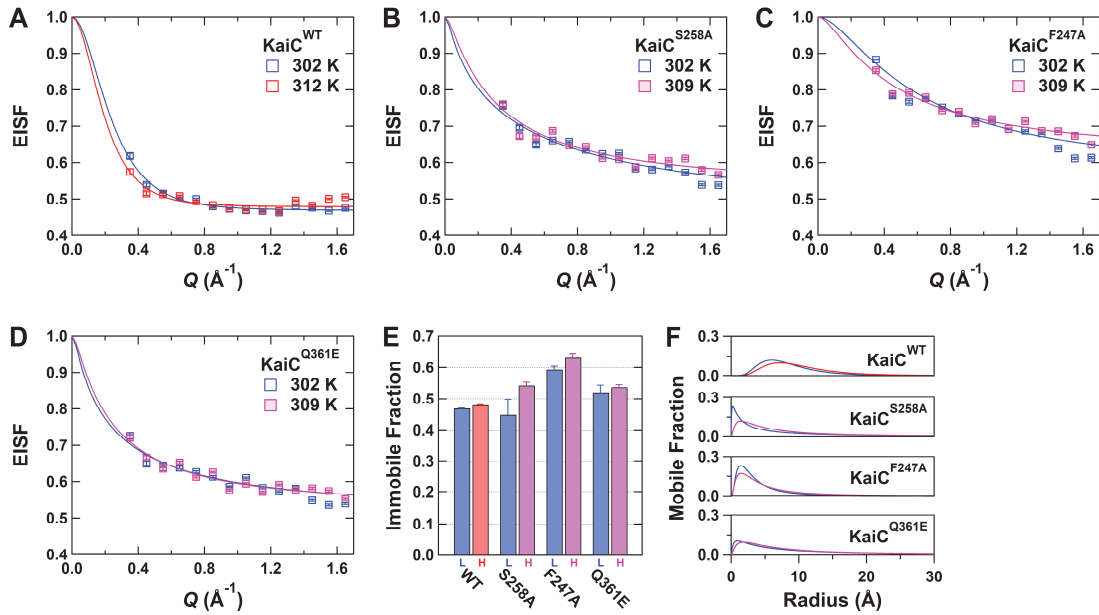

726  
727

728  
729

**Figure 6.** EISF analyses under the assumption of sphere-ensemble model for (A) KaiC<sup>WT</sup>, (B) KaiC<sup>S258A</sup>, (C) KaiC<sup>F247A</sup>, and (D) KaiC<sup>Q361E</sup>. Blue, red, and magenta boxes correspond to data acquired at 302, 312, and 309 K, respectively. Solid lines represent the resultant fits of Eq. 2. (E) Immobile fraction,  $p$ . Blue- and red/magenta-colored bars correspond to the parameters for low (L) and high (H) temperatures, respectively. (F) Radial distribution functions of mobile fraction at low (blue) and high (red or magenta) temperatures.

736

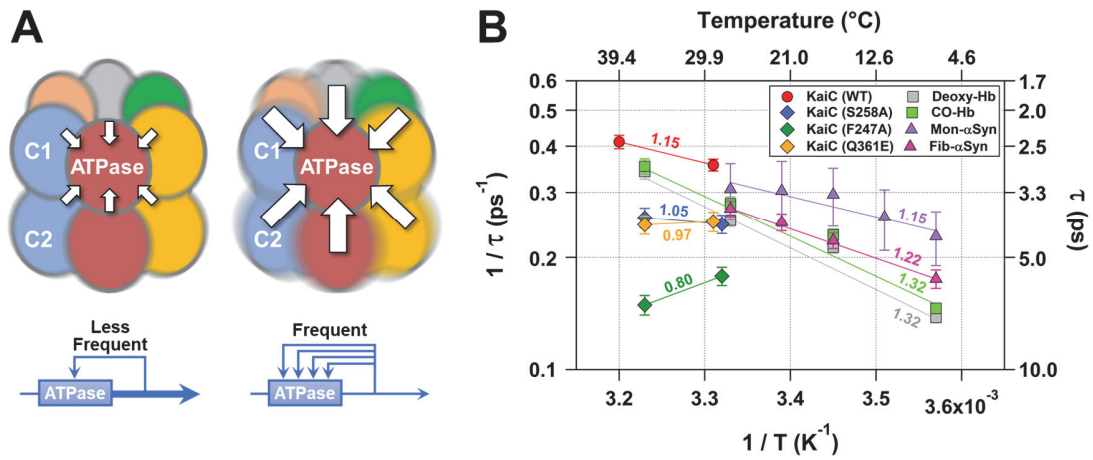

737  
738  
739  
740  
741  
742  
743  
744  
745  
746  
747  
748

**Figure 7.** Temperature-insensitive but active internal motions in KaiC as the basis of temperature compensability in the circadian clock system of cyanobacteria. (A) A model for C1-ATPase receiving regulatory feedback through thermal fluctuations of KaiC. (Left) Temperature-dependent ATPase under less frequent feedback. (Right) Temperature-compensated ATPase under frequent feedback. (B) Temperature dependences of jump-diffusion frequency ( $\tau^{-1}$ ) for KaiC, human hemoglobin (Hb), and  $\alpha$ -synuclein ( $\alpha$ Syn). QENS data of Hb and  $\alpha$ Syn are taken from previous studies<sup>33,51</sup>; activation energies of deoxygenated Hb (deoxy-Hb), CO-bound Hb (CO-Hb), fibrillized  $\alpha$ Syn (fib- $\alpha$ Syn), and monomeric  $\alpha$ Syn (mon- $\alpha$ Syn) are  $5.2 \pm 0.3$ ,  $5.2 \pm 0.3$ ,  $3.7 \pm 0.7$ , and  $2.6 \pm 1.9$  kcal mol<sup>-1</sup>, respectively. Values given near fitting lines represent the  $Q_{10,local}$  values estimated for 303 K.
